# Supplementary material
Source: PubMed Central journal article supplement (PMC3801175)
Supplement: NIHMS514226-supplement-01.pdf [file NIHMS514226-supplement-01.pdf]

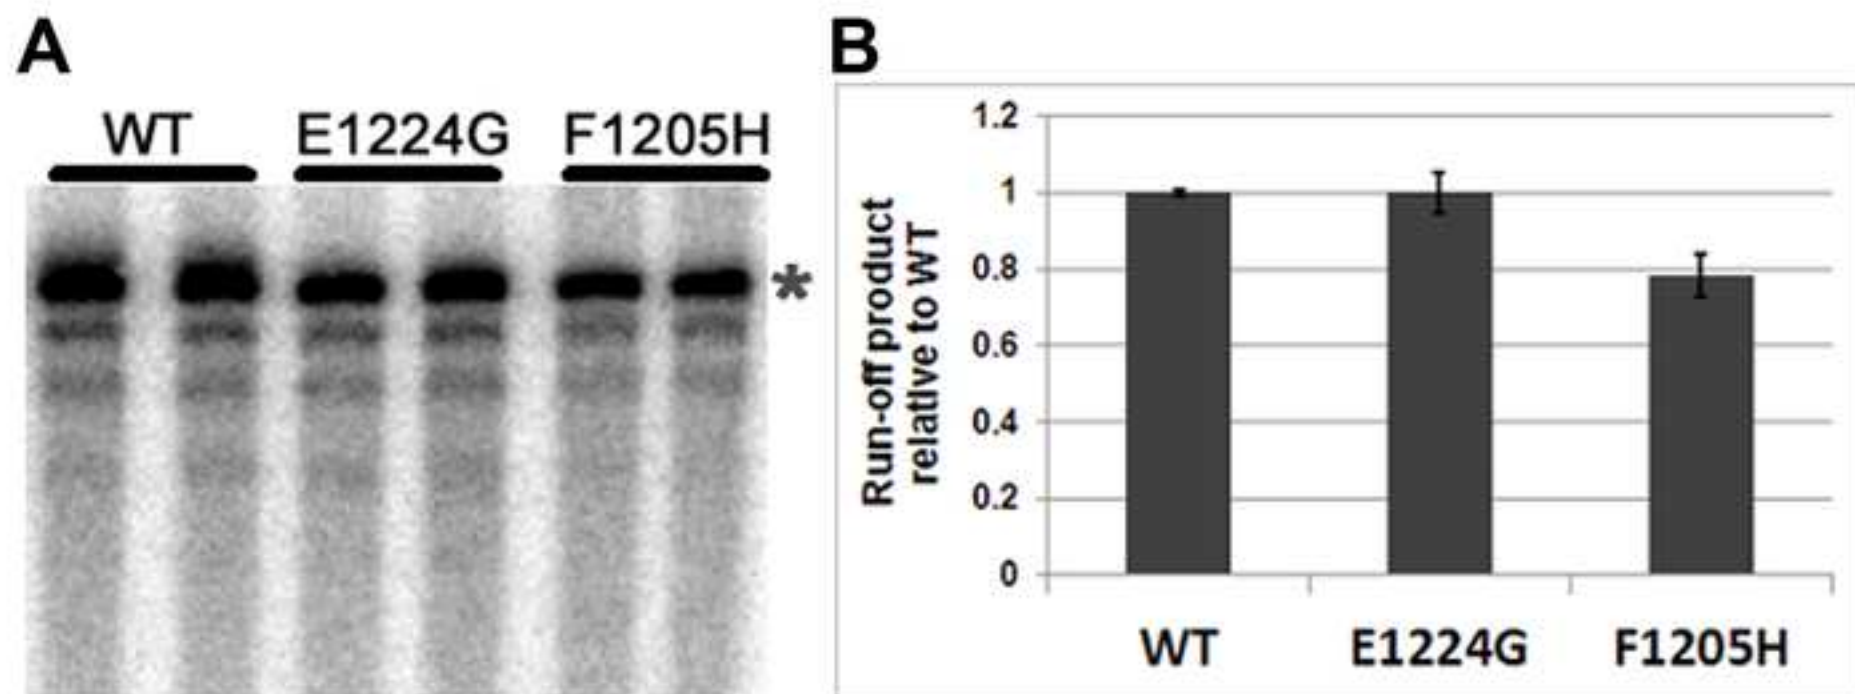

Figure S2

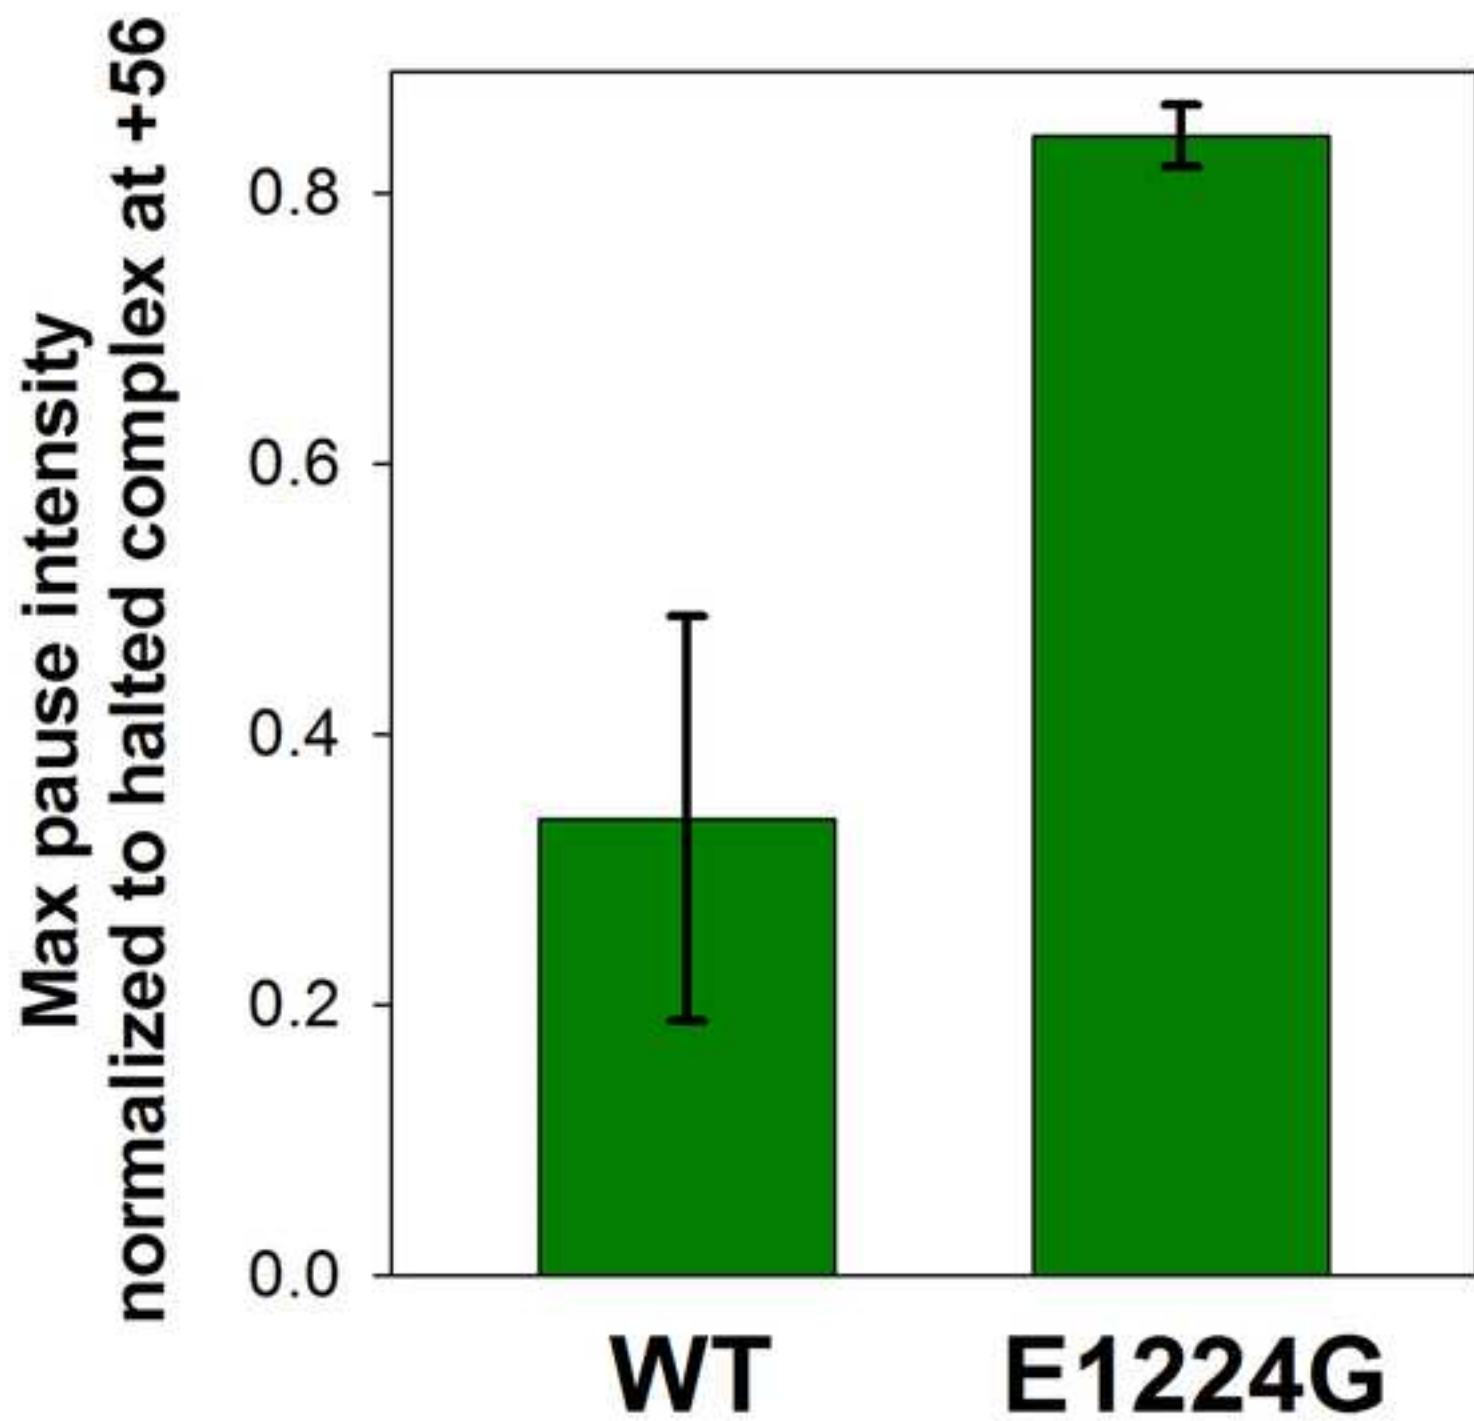

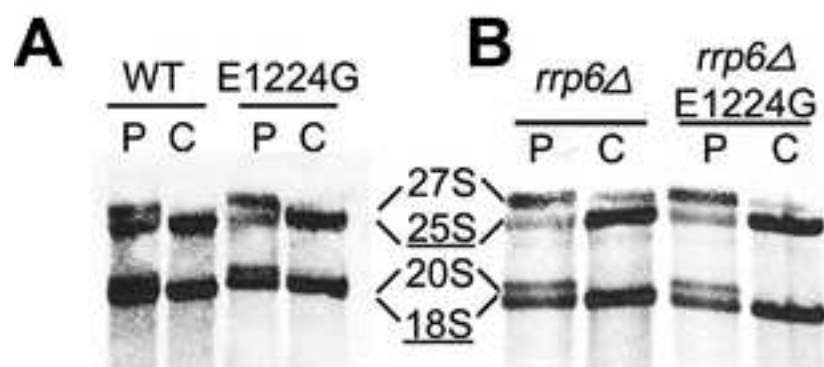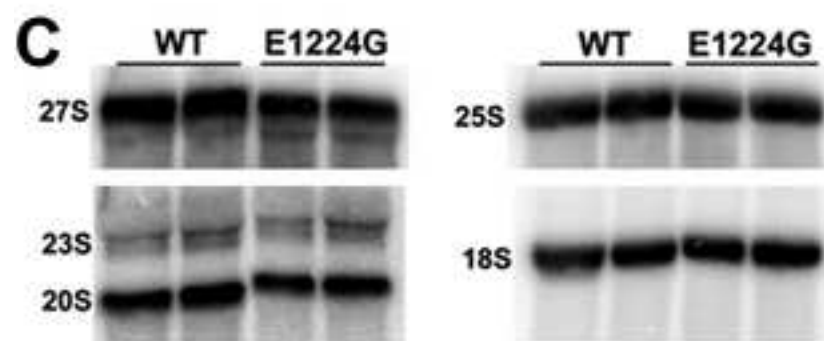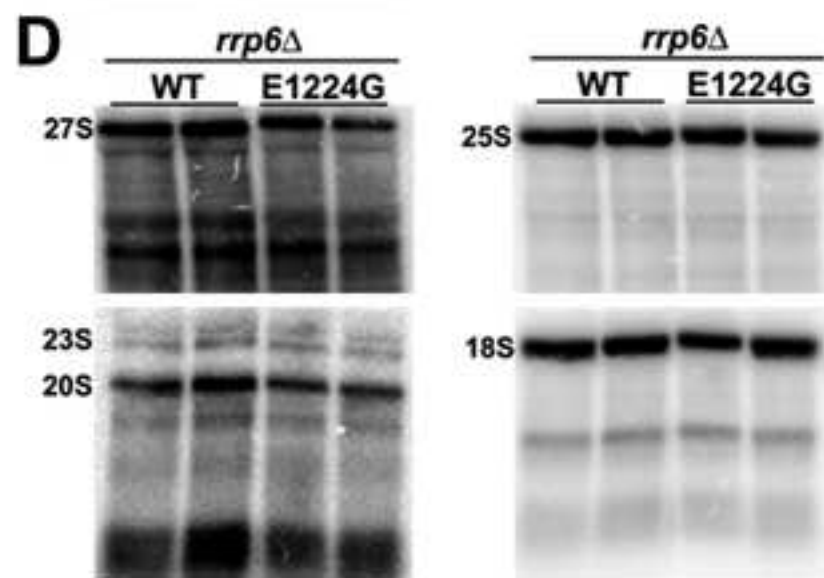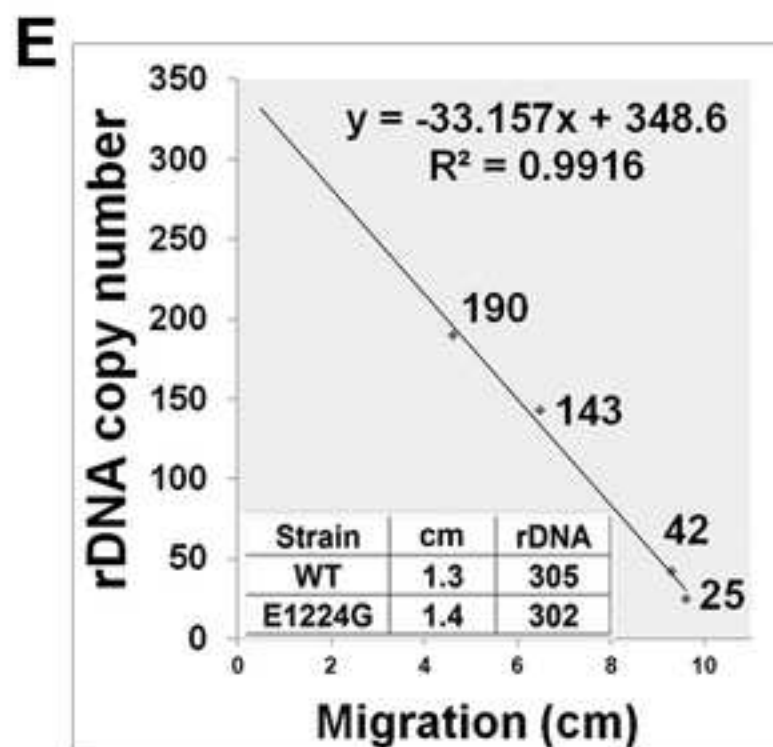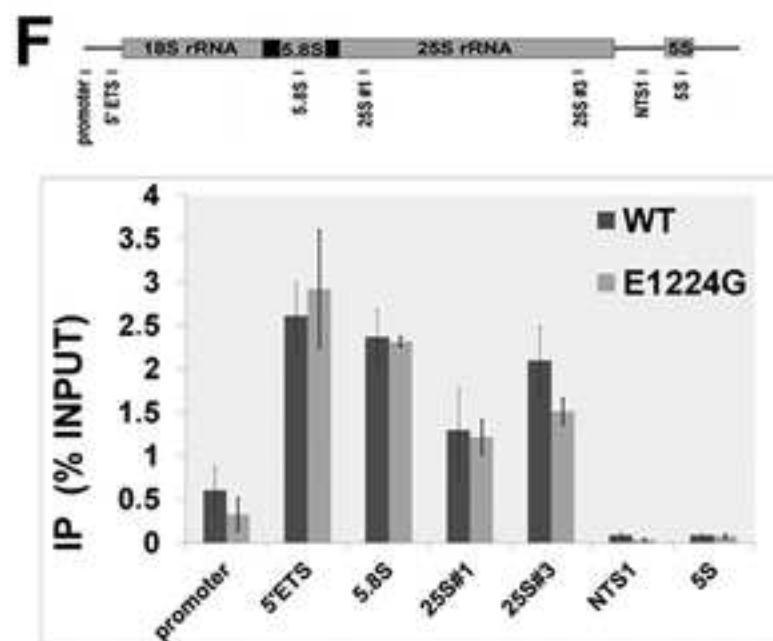

Figure S4

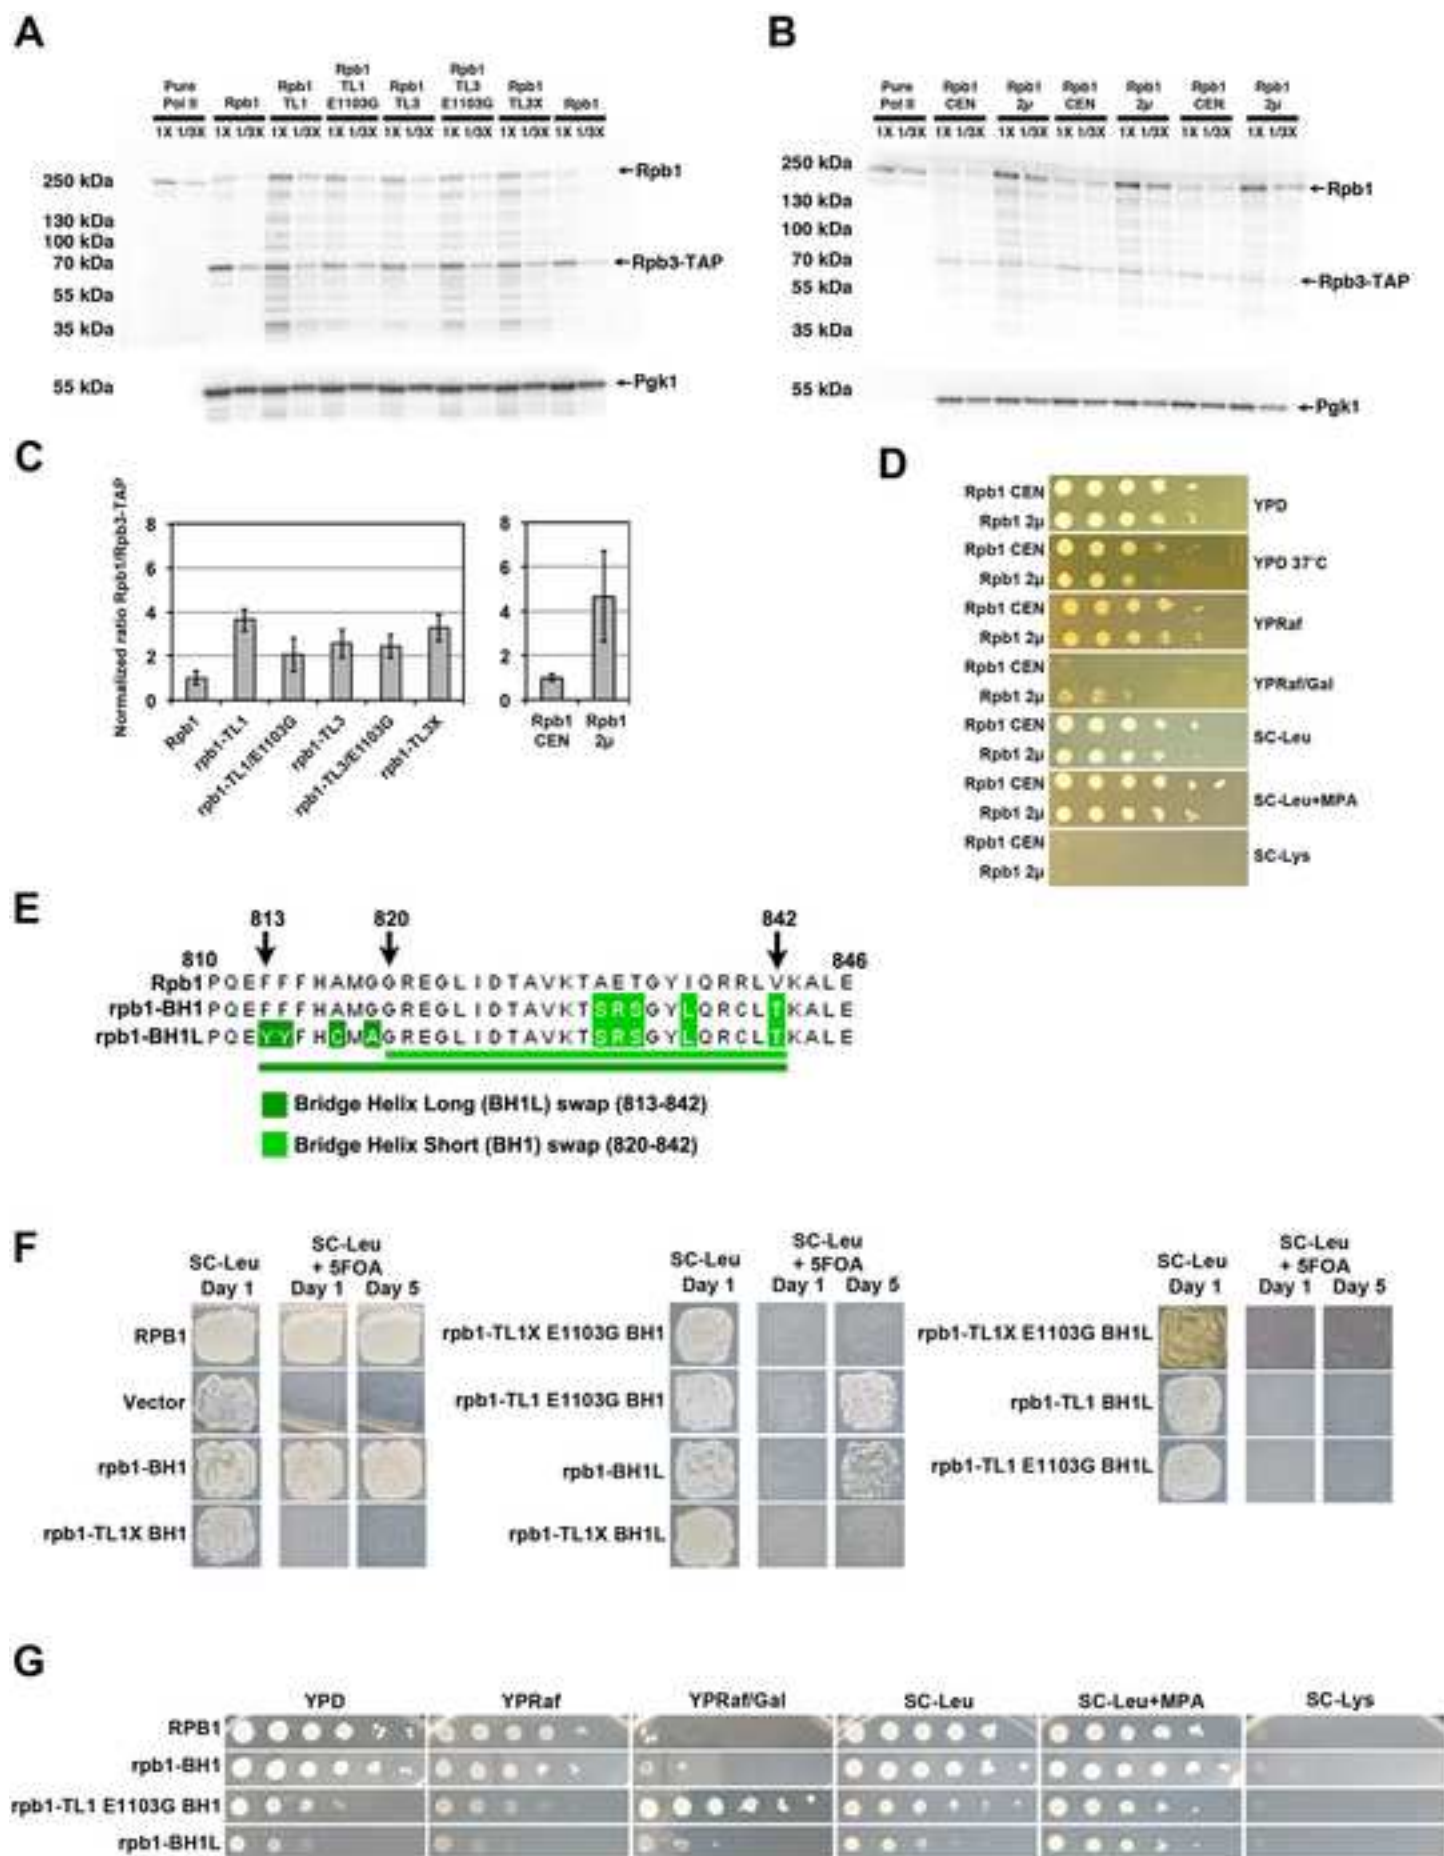

**Supplemental Data.****Figure S1. *In vitro* multiround transcription assay for Pol I, related to Figure 2****Activity of A190-E1224G and A190-F1205H Pol I complexes in multiround transcription assay. A)**

Promoter-dependent multiround transcription with purified components was performed exactly as described in (Bedwell et al., 2012). Yeast-derived pure Pol I (WT or mutant) was incubated with equimolar concentrations of recombinant Rm3 (Keener et al., 1998). The pre-initiation complex was assembled on the template (containing the rDNA promoter region and 336 nt of downstream DNA) using recombinant TBP and Core Factor, Upstream Activating Factor (UAF) purified from yeast, and pre-incubated Pol I-Rm3. Transcription reactions were initiated with NTPs [200  $\mu$ M of ATP, UTP and CTP, 15  $\mu$ M of GTP and 10  $\mu$ Ci  $\alpha$ -<sup>32</sup>P-GTP (800  $\mu$ Ci/mmol)], incubated for 5 minutes and stopped by addition of excess phenol. RNA was ethanol precipitated, separated by 8% polyacrylamide gel electrophoresis and visualized by autoradiography. The runoff product is indicated by the *asterisk*. The reactions were performed in duplicate. Data shown are representative from one of three independent assays. B) Quantifications of the run-off product were done using Quantity One software, average values relative to the WT control from the three independent assays and the standard deviations are shown.

**Figure S2. Quantification of *in vitro* pause intensity, related to Figure 2**

**Site specific pausing by A190-E1224G polymerase is enhanced *in vitro*.** Three independent transcription elongation rate assays at low NTP concentrations were performed with WT and A190-E1224G Pol I (representative assay shown in Figure 2C). The major pause site intensity (indicated by an asterisk in Figure 2C) was quantified in each experiment and the values were normalized to intensity of halted elongation complexes at +56. The resulting values were plotted, with error bars = +/- 1 standard deviation.

**Table S1. Total RNA synthesis rates of the *RPA190* and *rpa190-E1224G* strains, related to Table 1**

| Strain | Growth Rate (doublings/hr) | Total RNA, ng/ $\mu$ l | Predicted Synthesis Rate | Observed rRNA Synthesis Rate (from Figure S3 panel A) |
|--------|----------------------------|------------------------|--------------------------|-------------------------------------------------------|
| WT     | 0.52                       | 347.4                  | 1                        | 1                                                     |
| E1224G | 0.51                       | 288.3                  | 0.82                     | 0.94                                                  |

**Total RNA synthesis rates predicted for the *RPA190* and *rpa190-E1224G* strains.** Since the rRNA synthesis rates measured by <sup>3</sup>H-methylmethionine incorporation pulse-and chase assay were done in SD-Met medium, we measured the total RNA synthesis rates and growth rates in SD-Met for a better

comparison. Total RNA was extracted from exponentially growing cells and measured spectrophotometrically (NanoDrop ND1000). The predicted synthesis rate was quantified as (**Growth Rate**) X (**Total RNA**) and normalized to WT. These data are representative from one experiment, qualitatively similar results were obtained from repeated analyses from independent cultures grown on different days.

**Figure S3. The *rpa190-E1224G* mutant is not hyperactive *in vivo*, related to Figure 3**

**A)** Relative Pol I transcription rates were measured using the [<sup>3</sup>H]methylmethionine incorporation pulse-and-chase assay as described in (Zhang et al., 2010). Since rRNA is co-transcriptionally methylated, this method is an effective way to quantify rRNA synthesis *in vivo*. The cells were grown in SD-Met medium and pulse-labeled with [<sup>3</sup>H]methylmethionine for 5 minutes, and then chased with excess cold methionine to allow completion of rRNA processing. RNA was extracted from cells collected 4 minutes after pulse and 5 minutes after chase (Zhang et al., 2010). The RNA species were separated by gel-electrophoresis, transferred to a membrane and detected by autoradiography. The lanes indicated as P (“pulsed”) contain rRNA pulse-labeled for 4 min; and lanes C (“chased”) contains 5 min pulse-labeled rRNA followed by a 5 minute chase. Data shown are from one of two independent experiments. **B)** Same as panel A, except the metabolic labeling was done using the *rrp6Δ RPA190 (WT)* or *rrp6Δ rpa190-E1224G* cells. Rrp6 is a non-essential subunit of the nuclear exosome involved in degradation of unstable precursors and defective rRNA (Allmang et al., 2000). The *rrp6Δ rpa190-E1224G* double mutant does not accumulate rRNA degradation intermediates, precursors, or mature rRNA species when compared to the single mutants. This experiment is an additional control for co-transcriptional exosome-dependent decay of rRNA.

**C) Northern Blot analysis of the rRNA isolated from the *RPA190* and *rpa190-E1224G* strains.** The Northern blot analysis was performed as described in (Schneider et al., 2007). Total RNA was extracted from exponentially growing cells; equal amount of RNA was loaded onto the 0.8% agarose gel in duplicates and separated by electrophoresis. After electrophoresis, RNA was transferred to a membrane and analyzed by northern<sup>cm</sup> blot hybridization using <sup>32</sup>P-labeled oligonucleotide probes (described in the Table S2). The blot was visualized using phosphorimaging (The Storm, GE Healthsciences). The rRNA species detected by the probes are indicated on the figure. No significant difference in the signal between the mutant and the WT was observed. Data shown are from one of the three independent experiments. **D)** The *rrp6Δ* and the *rrp6Δ rpa190-E1224G* cells were processed as described for panel C. No significant difference in the signal between the *rrp6Δ* and the double mutant was observed, supporting the rRNA

synthesis data (panels A and B). Data shown are from one of the two independent experiments. **E) The rDNA copy number of the *RPA190* and *rpa190-E1224G* strains** was determined based on the size of the chromosome XII separated from other yeast chromosomes using the Contour-clamped Homogenous Field Electrophoresis (CHEF) (as in (Zhang et al., 2009) and visualized with SYBR-Safe staining (Invitrogen, Carlsbad, CA). The migration distance of the chromosome XII of the reference strains (containing 190, 143, 42 and 25 rDNA copy numbers) was plotted versus the rDNA array size. The resulting linear plot ( $R^2=0.9916$ ) yielded an equation [ $y=-33.2x+348.6$ ] which was used to calculate rDNA copy number for the WT and *rpa190-E1224G* strains. We observed that the number of rDNA repeats in the mutant strain is not altered compared to WT. Since the number of the rDNA loci can potentially affect rRNA synthesis rate and rRNA abundance, this experiment was an additional control for the relative Pol I activity in *rpa190-E1224G*. **F) The Chromatin Immunoprecipitation (ChIP) analysis of Pol I occupancy over rDNA** was performed using polyclonal antibody against A190 subunit as described previously (Zhang et al., 2009). The bound DNA was measured using quantitative PCR and displayed as a ratio of precipitated to total DNA. The location of the primer sets used for the PCR on the rRNA gene is schematically depicted on the top of the panel. Each bar represents the average IP/input value for at least two 10-fold dilutions from at least two independent cultures. Error bars represent  $\pm 1$  SD. We observed no significant changes in Pol I occupancy of any region of the rDNA (promoter or throughout the coding region) relative to the WT control. Thus, given similar rRNA synthesis rates (panel A), and similar numbers of active genes (panel E and Figure 4), transcription initiation rates are approximately equal in the WT and mutant.

**Table S2. Oligonucleotides used for the Northern Blot hybridization, related to Figures 3 and S3**

| Probe Target | Sequence                | Reference                        |
|--------------|-------------------------|----------------------------------|
| 18S          | 5'-AGCCATTCGCAGTTTCACTG | this study                       |
| 20S and 23S  | 5'-GCACAGAAATCTCTCACCGT | (Schneider <i>et al.</i> , 2007) |
| 27S          | 5'-GCCTAGACGCTCTCTTCTTA | (Schneider <i>et al.</i> , 2007) |
| 25S          | 5'-ACTAAGGCAATCCCGGTTGG | this study                       |

**Table S3. Summary of phenotypes observed in strains carrying chimeric alleles of *RPB1* (raw data shown in main text, Figure 4C)**

| Alleles                      | Phenotype       |                                |                  |                                          | Interpretation                                                   |
|------------------------------|-----------------|--------------------------------|------------------|------------------------------------------|------------------------------------------------------------------|
|                              | Growth on YEPD  | Suppression of <i>gal10Δ56</i> | Spt              | MPA sensitivity                          |                                                                  |
| <i>RPB1</i>                  | WT              | not suppressed                 | Spt <sup>+</sup> | Not MPA <sup>s</sup>                     | WT                                                               |
| Common GOFs (e.g. E1103G)    | N/A             | weak or no suppression         | Spt <sup>-</sup> | MPA <sup>s</sup>                         | GOF                                                              |
| Common LOFs (e.g. N479S)     | N/A             | strong suppression             | Spt <sup>+</sup> | MPA <sup>r</sup> or not MPA <sup>s</sup> | LOF                                                              |
| <i>rpb1-TL1</i>              | Severe defect   | strong suppression             | Spt <sup>+</sup> | MPA <sup>r</sup>                         | LOF                                                              |
| <i>rpb1-TL1/E1103G</i>       | Mild defect     | mild suppression               | Spt <sup>+</sup> | Not MPA <sup>s</sup>                     | E1103G suppresses <i>rpb1-TL1</i> growth phenotypes              |
| <i>rpb1-TL1X</i>             | Inviabile       |                                |                  |                                          | Inferred LOF                                                     |
| <i>rpb1-TL1X/E1103G</i>      | Moderate defect | strong suppression             | Spt <sup>+</sup> | Not MPA <sup>s</sup>                     | E1103G suppresses <i>rpb1-TL1X</i> inviability                   |
| <i>rpb1-TL1/N479S</i>        | Inviabile       |                                |                  |                                          | Double mutant lethality                                          |
| <i>rpb1-TL1/E1103G/N479S</i> | Severe defect   | strong suppression             | Spt <sup>+</sup> | MPA <sup>r</sup>                         | N479S suppresses growth suppression of <i>rpb1-TL1</i> by E1103G |
| <i>rpb1-TL3</i>              | No defect       | not suppressed                 | Spt <sup>+</sup> | Not MPA <sup>s</sup>                     | No obvious defect                                                |
| <i>rpb1-TL3/E1103G</i>       | Mild defect     | weak suppression               | Spt <sup>+</sup> | Not MPA <sup>s</sup>                     | E1103G slightly impairs <i>rpb1-TL3</i>                          |
| <i>rpb1-TL3/N479S</i>        | No defect       | weak suppression               | Spt <sup>+</sup> | Not MPA <sup>s</sup>                     | N479S impairs <i>rpb1-TL3</i>                                    |
| <i>rpb1-TL3/E1103G/N479S</i> | Mild defect     | strong suppression             | Spt <sup>+</sup> | Not MPA <sup>s</sup>                     | E1103G exacerbates effects of N479S on <i>rpb1-TL3</i>           |
| <i>rpb1-TL3X</i>             | Mild defect     | not suppressed                 | Spt <sup>+</sup> | Not MPA <sup>s</sup>                     | Mild LOF                                                         |

**Figure S4. Chimeric alleles of *RPB1* accumulate excess Rpb1, but this is not the cause of chimera phenotypes; enzymes bearing the Pol I bridge helix and the Pol I trigger loop sequences do not mutually suppress impaired Pol II function, related to Figure 4**

**Chimeric alleles of *RPB1* accumulate excess Rpb1, but this is not the cause of chimera phenotypes; enzymes bearing the Pol I bridge helix and the Pol I trigger loop sequences do not mutually suppress impaired Pol II function, related to Figure 4. A)** Western analysis for Rpb1 and Rpb3-TAP using anti-Rpb1 antibody (sc-25758, Santa Cruz Biotechnology) strains for WT and *rpb1-TL* chimera mutant strains. Extracts from equal cell equivalents and 1/3 said amount were subjected to SDS-PAGE,



immunoblotting and detection. Anti-Pgk1 (22C5D8, Life Technologies) blotting of same gel shown for loading control. **B)** Overexpression of Rpb1 via 2 $\mu$  *RPB1* plasmid was analyzed relative to low copy CEN *RPB1* plasmid as in (A) for Rpb1, Rpb3-TAP, and Pgk1. **C)** Quantification of Western blotting using Bio-Rad Chemi-Doc system in conjunction with ImageQuant software (GE) shown in (A)(left graph, n $\geq$ 4, average ratio Rpb1 signal/Rpb3-TAP signal  $\pm$  standard deviation shown) or (B)(right graph same as left, n=3). **D)** Phenotypes of *rpb1-TL* chimera do not appear to derive from the Rpb1 overexpression observed in (A) for *rpb1-TL* mutant strains as the equal or greater overexpression observed in (B) does not result in phenotypes observed in Figure 4C. Very slight suppression of *gal10 $\Delta$ 56* is of a different quality from Pol II-Pol I/III chimeras and is much more similar to the appearance of papillae. These papillae may relate to *RPB1* being present in high copy, which may facilitate the genesis of dominant *rpb1* suppressors of *gal10 $\Delta$ 56*. **E)** Summary of chimeric *RPB1* bridge helix alleles used in this study. **F)** Plasmid shuffle results measuring viability of individual *rpb1* alleles. The assay is performed as described in the main text for Figure 5B. **G)** Dilutions of viable strains were plated on indicated growth media. Phenotypes were assessed as described in the main text for Figure 4C. *rpb1-BH1* did not show significant defects compared to WT. *rpb1-TL1/E1103G/BH1* suppressed *gal10 $\Delta$ 56* mutation and *rpb1-BH1L* was resistant to MPA: both phenotypes consistent with Pol II loss-of-function alleles.

**Table S4. Strains used in this study, related to Figures 1-4**

**Table S5. Plasmids used in this study, related to Figures 1-4**

|                                     |                                                                                                                                       |
|-------------------------------------|---------------------------------------------------------------------------------------------------------------------------------------|
| pRS315                              | pBluescript, <i>CEN6</i> , <i>ARSH4</i> , <i>LEU2</i> (Sikorski and Hieter, 1989)                                                     |
| pRS316                              | pBluescript, <i>CEN6</i> , <i>ARSH4</i> , <i>URA3</i> (Sikorski and Hieter, 1989)                                                     |
| pRS315- <i>RPA190</i>               | pRS315 derivative carrying wild type <i>RPA190</i>                                                                                    |
| pRS316- <i>RPA190</i>               | pRS316 derivative carrying wild type <i>RPA190</i> (used for “plasmid shuffle” experiments)                                           |
| pRS306- <i>rpa190-E1224G</i>        | pRS306 (“suicide vector”) derivative carrying <i>rpa190-E1224G</i> used for the integration of <i>rpa190-E1224G</i> on the chromosome |
| pRS315- <i>rpa190-E1224G</i>        | pRS315 derivatives carrying corresponding <i>rpa190</i> mutant alleles                                                                |
| pRS315- <i>rpa190-F1205H</i>        |                                                                                                                                       |
| pRS315- <i>rpa190-N1203S</i>        |                                                                                                                                       |
| pRS315- <i>rpa190-N1203S/E1224G</i> |                                                                                                                                       |
| pRS315- <i>rpa190-H1206Y</i>        |                                                                                                                                       |
| pRS315- <i>rpa190-H1206Q</i>        |                                                                                                                                       |
| pRS315- <i>rpa190-H1206Q/E1224G</i> |                                                                                                                                       |
| pRS315- <i>rpa190-F1207S</i>        |                                                                                                                                       |
| pRS315- <i>rpa190-F1207S/E1224G</i> |                                                                                                                                       |

|                                     |                                                                                  |
|-------------------------------------|----------------------------------------------------------------------------------|
| pRS315- <i>rpa190-G1218D</i>        |                                                                                  |
| pRS315- <i>rpa190-L1222S</i>        |                                                                                  |
| pRS315- <i>rpa190-L1222S/E1224G</i> |                                                                                  |
| <b>pCK plasmids:</b>                | pRS315 derivatives with corresponding <i>RPB1</i> alleles unless otherwise noted |
| pCK859                              | <i>RPB1</i> (Kaplan et al., 2012)                                                |
| pCK960                              | <i>rpb1 E1103G</i> (Kaplan et al., 2012 )                                        |
| pCK856                              | <i>rpb1 N479S</i> (Kaplan et al., 2012 )                                         |
| pCK964                              | <i>rpb1 N479S/E1103G</i> (Kaplan et al., 2012 )                                  |
| pCK1143                             | pRS425 (2 $\mu$ <i>LEU2</i> ) derivative carrying <i>RPB1</i>                    |
| pCK1366                             | <i>rpb1-TL1/N479S</i>                                                            |
| pCK1367                             | <i>rpb1-TL1/E1103G/N479S</i>                                                     |
| pCK1368                             | <i>rpb1-TL1X/E1103G/N479S</i>                                                    |
| pCK1369                             | <i>rpb1-TL3/N479S</i>                                                            |
| pCK1371                             | <i>rpb1-TL1X/N479S</i>                                                           |
| pCK1372                             | <i>rpb1-TL1X BH1</i>                                                             |
| pCK1373                             | <i>rpb1-TL1X BH1L</i>                                                            |
| pCK1374                             | <i>rpb1-TL1 E1103G BH1</i>                                                       |
| pCK1375                             | <i>rpb1-TL1X E1103G BH1</i>                                                      |
| pCK1376                             | <i>rpb1-TL1 BH1L</i>                                                             |
| pCK1377                             | <i>rpb1-TL1 E1103G BH1L</i>                                                      |
| pCK1378                             | <i>rpb1-TL1</i>                                                                  |
| pCK1379                             | <i>rpb1-TL1/E1103G</i>                                                           |
| pCK1380                             | <i>rpb1-TL3</i>                                                                  |
| pCK1381                             | <i>rpb1-TL3/E1103G</i>                                                           |
| pCK1382                             | <i>rpb1-TL1X</i>                                                                 |
| pCK1383                             | <i>rpb1-BH1L</i>                                                                 |
| pCK1384                             | <i>rpb1-TL1 E1103G BH1</i>                                                       |
| pCK1385                             | <i>rpb1-TL1X/E1103G</i>                                                          |
| pCK1386                             | <i>rpb1-BH1</i>                                                                  |
| pCK1387                             | <i>rpb1-TL1</i>                                                                  |
| pCK1390                             | <i>rpb1-TL3</i>                                                                  |
| pCK1393                             | <i>rpb1-TL3/E1103G</i>                                                           |
| pCK1394                             | <i>rpb1-TL3/E1103G/N479S</i>                                                     |
| pCK1395                             | <i>rpb1-TL1X E1103G BH1L</i>                                                     |
| pCK1397                             | <i>rpb1-TL3X</i>                                                                 |

### Supplemental References

1. Allmang, C., Mitchell, P., Petfalski, E., and Tollervey, D. (2000). Degradation of ribosomal RNA precursors by the exosome. *Nucleic acids research* 28, 1684-1691.
2. Bedwell, G.J., Appling, F.D., Anderson, S.J., and Schneider, D.A. (2012). Efficient transcription by RNA polymerase I using recombinant core factor. *Gene* 492, 94-99.
3. Kaplan, C.D., Jin, H., Zhang, I.L., and Belyanin, A. (2012). Dissection of Pol II Trigger Loop Function and Pol II Activity-Dependent Control of Start Site Selection In Vivo. *Plos Genet* 8.
4. Keener, J., Josaitis, C.A., Dodd, J.A., and Nomura, M. (1998). Reconstitution of yeast RNA polymerase I transcription in vitro from purified components. TATA-binding protein is not required for basal transcription. *J Biol Chem.* 273, 33795-33802.

5. Schneider, D.A., Michel, A., Sikes, M.L., Vu, L., Dodd, J.A., Salgia, S., Osheim, Y.N., Beyer, A.L., and Nomura, M. (2007). Transcription elongation by RNA polymerase I is linked to efficient rRNA processing and ribosome assembly. *Molecular cell* 26, 217-229.
6. Sikorski, R.S., and Hieter, P. (1989). A system of shuttle vectors and yeast host strains designed for efficient manipulation of DNA in *Saccharomyces cerevisiae*. *Genetics* 122, 19-27.
7. Zhang, Y., Sikes, M.L., Beyer, A.L., and Schneider, D.A. (2009). The Paf1 complex is required for efficient transcription elongation by RNA polymerase I. *Proceedings of the National Academy of Sciences of the United States of America* 106, 2153-2158.
8. Zhang, Y., Smith, A.D.t., Renfrow, M.B., and Schneider, D.A. (2010). The RNA polymerase-associated factor 1 complex (Paf1C) directly increases the elongation rate of RNA polymerase I and is required for efficient regulation of rRNA synthesis. *The Journal of biological chemistry* 285, 14152-14159.

| Strain             | Description                                                                                                                                                                             | Reference                                    |
|--------------------|-----------------------------------------------------------------------------------------------------------------------------------------------------------------------------------------|----------------------------------------------|
| DAS496<br>(WT)     | <i>MAT<math>\alpha</math> ade2-1 ura3-1 trp1-1 leu2-3 112 his3-11,15 can1-100 RPA135-(HA)3-(His)7: TRP1 Mx6 rpa190<math>\Delta</math>::HIS3Mx6</i> carrying <i>pRS315-RPA190</i>        | this study                                   |
| DAS702<br>(E1224G) | <i>MAT<math>\alpha</math> ade2-1 ura3-1 trp1-1 leu2-3 112 his3-11,15 can1-100 RPA135-(HA)3-(His)7: TRP1 Mx6 rpa190<math>\Delta</math>::HIS3Mx6</i> carrying <i>pRS315-rpa190-E1224G</i> | this study                                   |
| DAS701             | <i>MAT<math>\alpha</math> ade2-1 ura3-1 trp1-1 leu2-3 112 his3-11,15 can1-100 rpa190-E1224G::LEU2Mx6</i>                                                                                | this study                                   |
| DAS715             | same as DAS701, except <b>MAT a</b>                                                                                                                                                     | this study                                   |
| DAS479             | <b>MAT a</b> <i>ade2-1 ura3-1 trp1-1 leu2-3 112 his3-11,15 can1-100 rpa135-D784G: : neurseothricin-r</i>                                                                                | this study                                   |
| DAS703             | <b>MAT a</b> <i>ade2-1 ura3-1 trp1-1 leu2-3 112 his3-11,15 can1-100 rpa49<math>\Delta</math>::KANMx6</i>                                                                                | this study                                   |
| DAS531             | <b>MAT a</b> <i>ade2-1 ura3-1 trp1-1 leu2-3 112 his3-11,15 can1-100 rpa12<math>\Delta</math>::URA4Mx6</i>                                                                               | this study                                   |
| DAS515             | <b>MAT a</b> <i>ade2-1 ura3-1 trp1-1 leu2-3 112 his3-11,15 can1-100 paf1<math>\Delta</math>::HIS3Mx6</i>                                                                                | <a href="#">(Zhang et al., 2009)</a>         |
| DAS607             | <i>MAT<math>\alpha</math> ade2-1 ura3-1 trp1-1 leu2-3 112 his3-11,15 can1-100 spt5(1-797) -(HA)<sub>3</sub>-(His)<sub>7</sub>:HIS3Mx6</i>                                               | <a href="#">(Viktorovskaya et al., 2011)</a> |
| NOY2167            | <b>MAT a</b> <i>ade2-1 ura3-1 trp1-1 leu2-3 112 his3-11,15 can1-100 spt4<math>\Delta</math>:HIS3Mx6</i>                                                                                 | <a href="#">(Schneider et al., 2006)</a>     |
| DAS704             | <b>MAT a</b> <i>ade2-1 ura3-1 trp1-1 leu2-3 112 his3-11,15 can1-100 rrp6<math>\Delta</math>::KANMx6</i>                                                                                 | this study                                   |
| DAS206             | <i>MAT<math>\alpha</math> ade2-1 ura3-1 trp1-1 leu2-3 112 his3-11,15 can1-100 trf4<math>\Delta</math>: HIS3Mx6</i>                                                                      | <a href="#">(Schneider et al., 2007)</a>     |
| NOY1075            | <b>MAT a</b> <i>ade2-1 ura3-1 trp1-1 leu2-3 112 his3-11,15 can1-100 rrn3-S213P</i>                                                                                                      | <a href="#">(Claypool et al., 2004)</a>      |
| DAS562             | <i>MAT<math>\alpha</math> ade2-1 ura3-1 trp1-1 leu2-3 112 his3-11,15 can1-100 uaf30<math>\Delta</math>::HIS3Mx6</i>                                                                     | this study                                   |

|                                  |                                                                                                                                 |                                       |
|----------------------------------|---------------------------------------------------------------------------------------------------------------------------------|---------------------------------------|
| DAS705                           | <i>MAT a/α</i> diploid resulted from cross DAS701 x DAS479                                                                      | this study                            |
| DAS706                           | <i>MAT a/α</i> diploid resulted from cross DAS701 x DAS703                                                                      | this study                            |
| DAS707                           | <i>MAT a/α</i> diploid resulted from cross DAS715 x DAS607                                                                      | this study                            |
| DAS708                           | <i>MAT a/α</i> diploid resulted from cross DAS701 x DAS531                                                                      | this study                            |
| DAS709                           | <i>MAT a/α</i> diploid resulted from cross DAS701 x DAS515                                                                      | this study                            |
| DAS711                           | <i>MAT a/α</i> diploid resulted from cross DAS701 x NOY2167                                                                     | this study                            |
| DAS710                           | <i>MAT a/α</i> diploid resulted from cross DAS715 x DAS206                                                                      | this study                            |
| DAS712                           | <i>MAT a/α</i> diploid resulted from cross DAS702 x DAS704                                                                      | this study                            |
| DAS713                           | <i>MAT a/α</i> diploid resulted from cross DAS701 x NOY1075                                                                     | this study                            |
| DAS714                           | <i>MAT a/α</i> diploid resulted from cross DAS715 x DAS562                                                                      | this study                            |
| DAS716<br>( <i>rrp6Δ</i> )       | <i>MATα ade2-1 ura3-1 trp1-1 leu2-3 112 his3-11,15 can1-100 rpa190Δ::HIS3Mx6 rrp6Δ::KANMx6 carrying pRS315-RPA190</i>           | this study                            |
| DAS717<br>( <i>rrp6Δ</i> E1224G) | <i>MAT? ade2-1 ura3-1 trp1-1 leu2-3 112 his3-11,15 can1-100 rpa190Δ::HIS3Mx6 rrp6Δ::KANMx6 carrying pRS315-rpa190-E1224G</i>    | this study                            |
| NOY1071                          | <i>MATα ade2-1 ura3-1 trp1-1 leu2-3 112 his3-11,15 can1-100 fob1Δ::HIS3Mx6 rDNA copy number ~25</i>                             | <a href="#">(Cioci F, 2003)</a>       |
| NOY886                           | <i>MATα ade2-1 ura3-1 trp1-1 leu2-3 112 his3-11,15 can1-100 fob1Δ::HIS3Mx6 rpa135Δ::LEU2 with pNOY117, rDNA copy number ~42</i> | <a href="#">(French et al., 2003)</a> |
| NOY1051                          | same as NOY886, except <i>rDNA copy number ~143</i>                                                                             | <a href="#">(French et al., 2003)</a> |

|                        |                                                                                                                                                                                                                 |                                       |
|------------------------|-----------------------------------------------------------------------------------------------------------------------------------------------------------------------------------------------------------------|---------------------------------------|
| NOY1064                | same as NOY1071, except <i>rDNA copy number ~190</i>                                                                                                                                                            | <a href="#">(Cioci F, 2003)</a>       |
| DAS721 (F1205H)        | <i>MATα ade2-1 ura3-1 trp1-1 leu2-3 112 his3-11,15 can1-100 RPA135-(HA)3-(His)7: TRP1 Mx6 rpa190Δ::HIS3Mx6 carrying pRS315-rpa190-F1205H</i>                                                                    | this study                            |
| DAS764 (L1222S)        | <i>MATα ade2-1 ura3-1 trp1-1 leu2-3 112 his3-11,15 can1-100 RPA135-(HA)3-(His)7: TRP1 Mx6 rpa190Δ::HIS3Mx6 carrying pRS315-rpa190-L1222S</i>                                                                    | this study                            |
| DAS765 (N1203S/E1224G) | <i>MATα ade2-1 ura3-1 trp1-1 leu2-3 112 his3-11,15 can1-100 RPA135-(HA)3-(His)7: TRP1 Mx6 rpa190Δ::HIS3Mx6 carrying pRS315-rpa190- N1203S/E1224G</i>                                                            | this study                            |
| DAS766 (F1207S)        | <i>MATα ade2-1 ura3-1 trp1-1 leu2-3 112 his3-11,15 can1-100 RPA135-(HA)3-(His)7: TRP1 Mx6 rpa190Δ::HIS3Mx6 carrying pRS315-rpa190-F1207S</i>                                                                    | this study                            |
| DAS767 (F1207S/E1224G) | <i>MATα ade2-1 ura3-1 trp1-1 leu2-3 112 his3-11,15 can1-100 RPA135-(HA)3-(His)7: TRP1 Mx6 rpa190Δ::HIS3Mx6 carrying pRS315-rpa190-F1207S/E1224G</i>                                                             | this study                            |
| DAS768 (H1206Q)        | <i>MATα ade2-1 ura3-1 trp1-1 leu2-3 112 his3-11,15 can1-100 RPA135-(HA)3-(His)7: TRP1 Mx6 rpa190Δ::HIS3Mx6 carrying pRS315-rpa190-H1206Q</i>                                                                    | this study                            |
| DAS769 (H1206Q/E1224G) | <i>MATα ade2-1 ura3-1 trp1-1 leu2-3 112 his3-11,15 can1-100 RPA135-(HA)3-(His)7: TRP1 Mx6 rpa190Δ::HIS3Mx6 carrying pRS315-rpa190-H1206Q/E1224G</i>                                                             | this study                            |
| DAS770                 | <i>MATα ade2-1 ura3-1 trp1-1 leu2-3 112 his3-11,15 can1-100 RPA135-(HA)3-(His)7: TRP1 Mx6 rpa190Δ::HIS3Mx6 carrying pRS316-RPA190 and pRS315-rpa190-</i>                                                        | this study                            |
| DAS771                 | <i>MATα ade2-1 ura3-1 trp1-1 leu2-3 112 his3-11,15 can1-100 RPA135-(HA)3-(His)7: TRP1 Mx6 rpa190Δ::HIS3Mx6 carrying pRS316-RPA190 and pRS315-rpa190-</i>                                                        | this study                            |
| DAS772                 | <i>MATα ade2-1 ura3-1 trp1-1 leu2-3 112 his3-11,15 can1-100 RPA135-(HA)3-(His)7: TRP1 Mx6 rpa190Δ::HIS3Mx6 carrying pRS316-RPA190 and pRS315-rpa190-</i>                                                        | this study                            |
| DAS773                 | <i>MATα ade2-1 ura3-1 trp1-1 leu2-3 112 his3-11,15 can1-100 RPA135-(HA)3-(His)7: TRP1 Mx6 rpa190Δ::HIS3Mx6 carrying pRS316-RPA190 and pRS315-rpa190-</i>                                                        | this study                            |
| CKY283                 | <i>MATα ura3-52 his3Δ200 leu2Δ1 or Δ0 trp1Δ63 met15Δ0 lys2-1280 gal10Δ56 rpb1Δ::CLONATMX RPB3::TAP::KlacTRP1 [pRP112 RPB1 URA3 CEN]</i>                                                                         | <a href="#">(Kaplan et al., 2008)</a> |
| CKY1271                | <i>MATα ura3-52 his3Δ200 leu2Δ1 or Δ0 trp1Δ63 met15Δ0 lys2-1280 gal10Δ56 rpb1Δ::CLONATMX RPB3::TAP::KlacTRP1 [ rpb1-TL1/E1103G/N479S LEU2 CEN]</i> further referred as to<br>CKY283 derivative carrying pCK1367 | this study                            |
| CKY1272                | CKY283 derivative carrying pCK1369                                                                                                                                                                              | this study                            |

|         |                                    |            |
|---------|------------------------------------|------------|
| CKY1273 | CKY283 derivative carrying pCK1374 | this study |
| CKY1274 | CKY283 derivative carrying pCK1378 | this study |
| CKY1275 | CKY283 derivative carrying pCK1379 | this study |
| CKY1276 | CKY283 derivative carrying pCK1380 | this study |
| CKY1277 | CKY283 derivative carrying pCK1383 | this study |
| CKY1278 | CKY283 derivative carrying pCK1384 | this study |
| CKY1279 | CKY283 derivative carrying pCK1385 | this study |
| CKY1280 | CKY283 derivative carrying pCK1386 | this study |
| CKY1281 | CKY283 derivative carrying pCK1387 | this study |
| CKY1282 | CKY283 derivative carrying pCK1391 | this study |
| CKY1283 | CKY283 derivative carrying pCK1393 | this study |
| CKY1284 | CKY283 derivative carrying pCK1394 | this study |
| CKY1285 | CKY283 derivative carrying pCK859  | this study |
| CKY1286 | CKY283 derivative carrying pCK960  | this study |
| CKY1287 | CKY283 derivative carrying pCK856  | this study |
| CKY1288 | CKY283 derivative carrying pCK964  | this study |
| CKY1340 | CKY283 derivative carrying pCK1143 | this study |
